# Supplementary material
Source: publisher site journal article supplement (https://www.dovepress.com/article/394894)
Supplement: Supplementary file 1 [file get_supplementary_file.php]

**Supplementary Figure 1.** Univariate and multivariate Cox regression analysis results in the ICI-treated cohort.

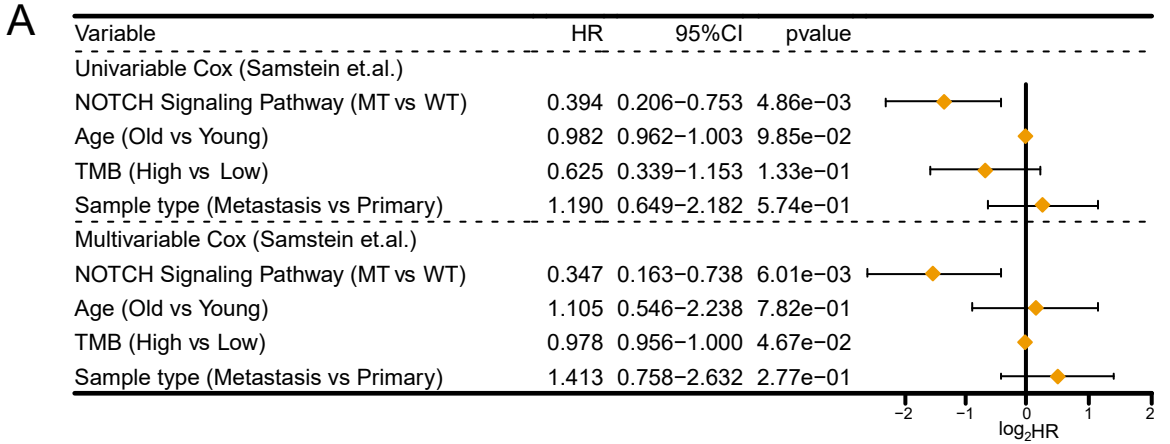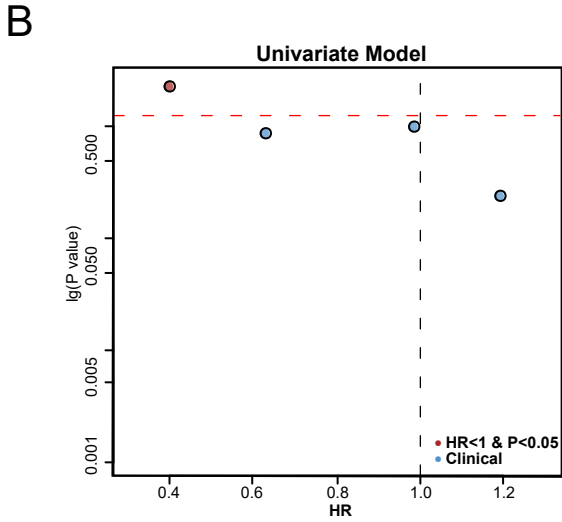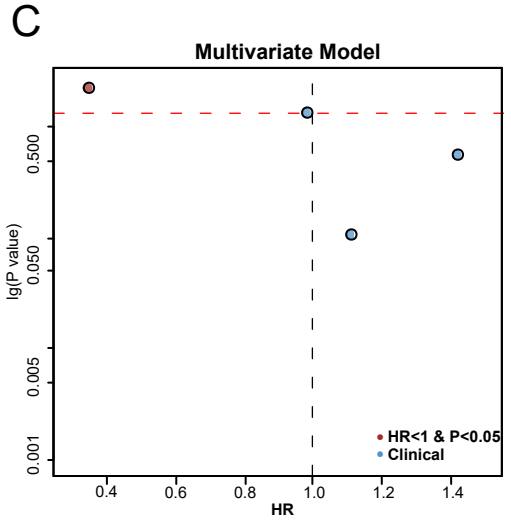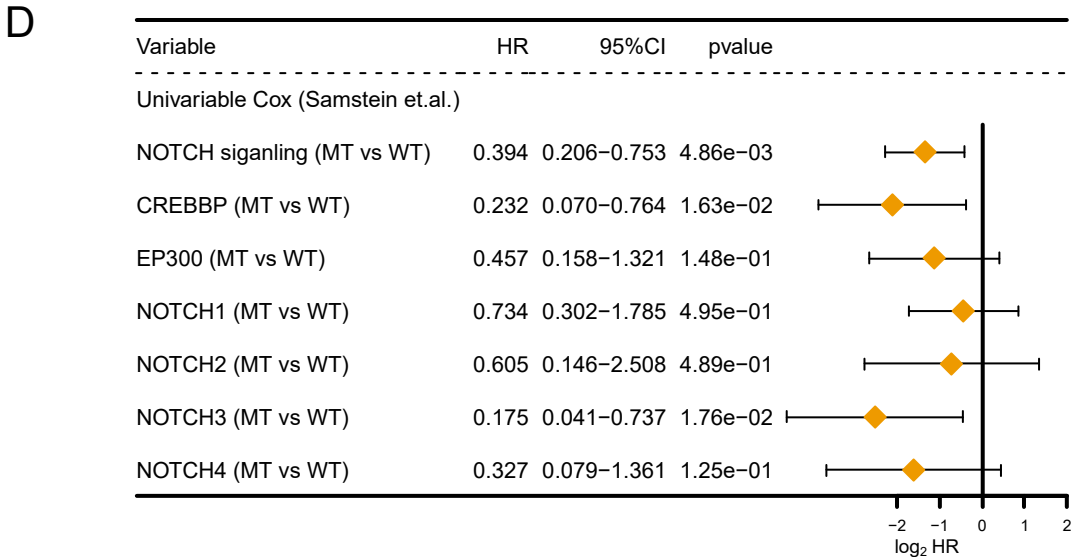

**Supplementary Figure 2. (A)** KM survival curves for OS rate among patients in the OSR cohort. **(B)** Shared genes in the NOTCH pathway gene set among the 3 cohorts. **(C)** Genomic profiles of CRC patients in the TCGA-CRC cohort.

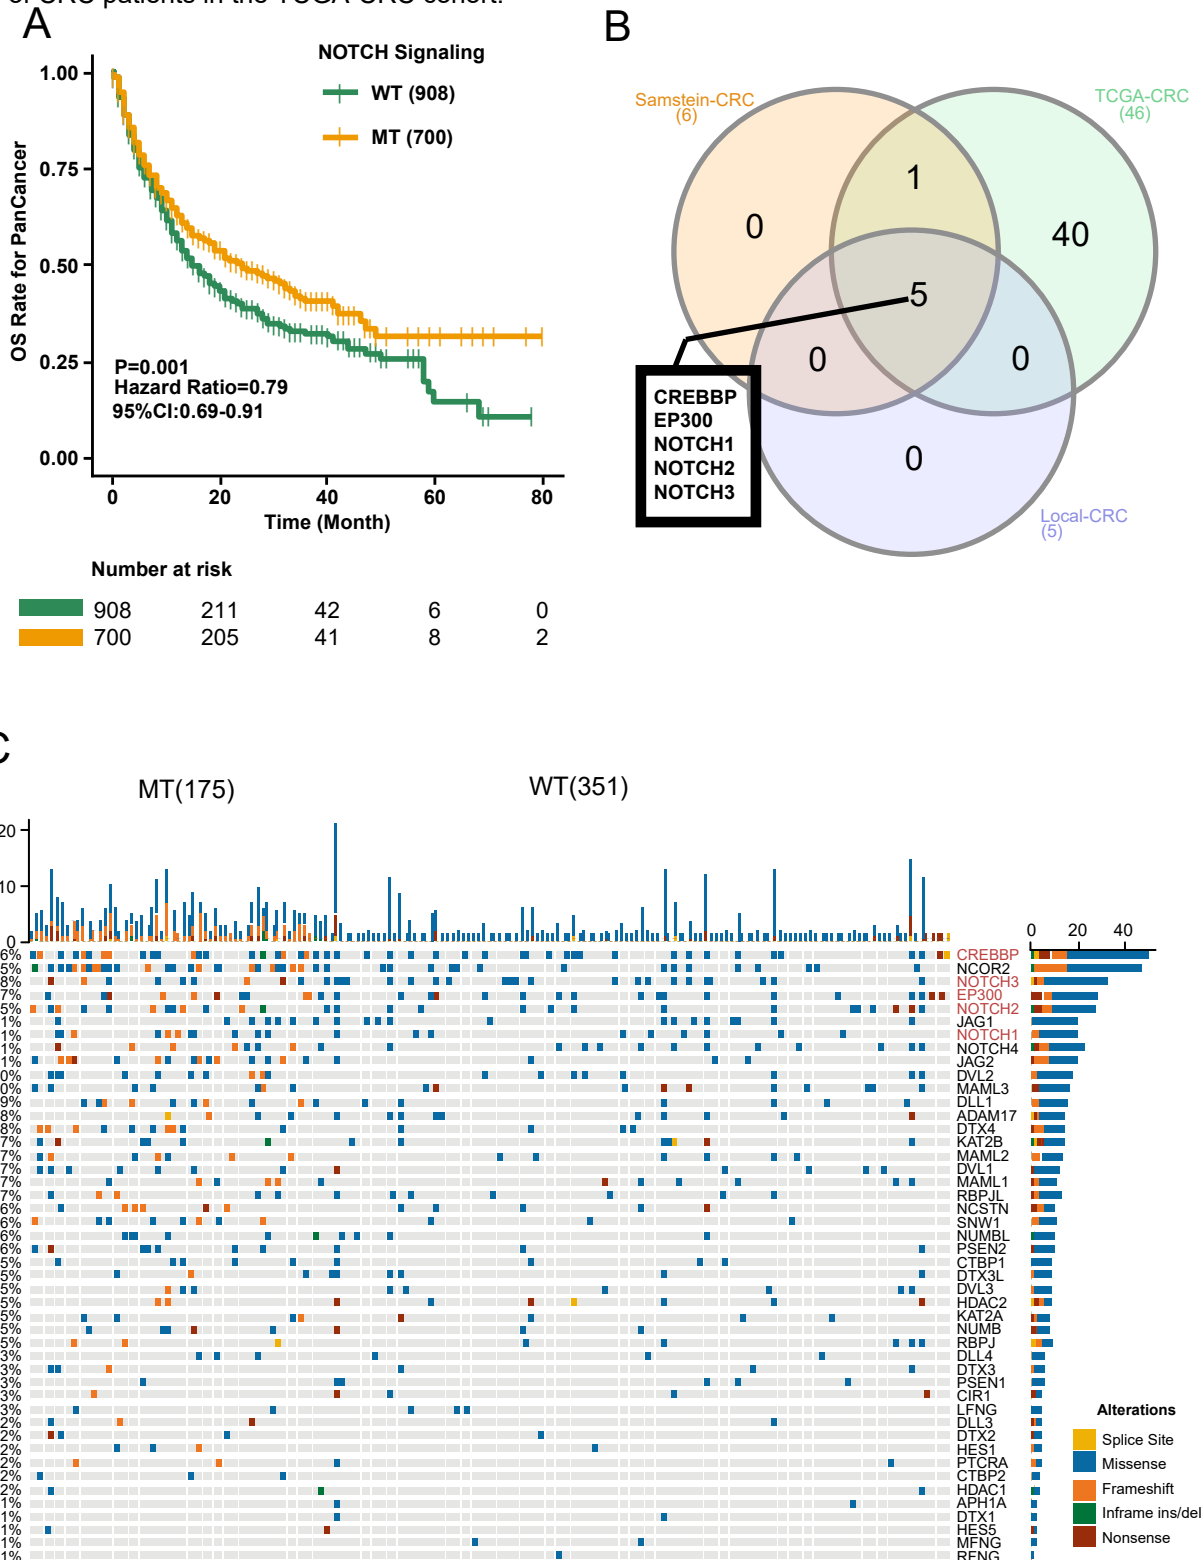

**Supplementary Figure 3.** The signalling principle of the NOTCH signalling pathway.

**NOTCH SIGNALING PATHWAY**

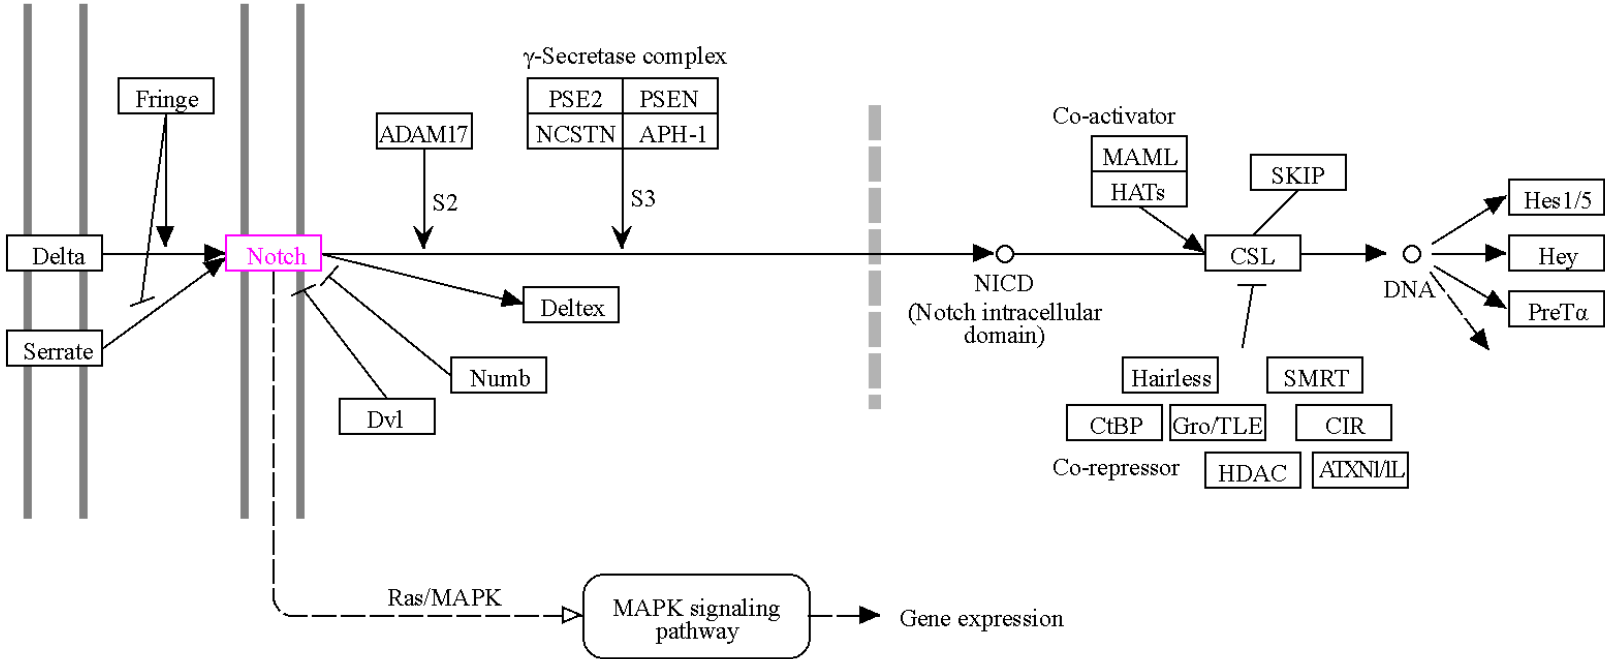

**Supplementary Table 1. Solid Tumour Clinical 680 Genes Full List.**

## Schedule 1: Solid Tumor Clinical 680 Genes Full List

|                              |                              |
|------------------------------|------------------------------|
| <i>ABCB1</i> (NM_000927)     | <i>KMT2B</i> (NM_014727)     |
| <i>ACTL6A</i> (NM_004301)    | <i>KRT14</i> (NM_000526)     |
| <i>ALDH2</i> (NM_000690)     | <i>KDM5C</i> (NM_004187)     |
| <i>AREG</i> (NM_001657)      | <i>KIF1B</i> (NM_015074)     |
| <i>ATR</i> (NM_001184)       | <i>KLF4</i> (NM_004235)      |
| <i>ABCC1</i> (NM_004996)     | <i>KMT2C</i> (NM_170606)     |
| <i>ACVR1</i> (NM_001105)     | <i>KRT15</i> (NM_002275)     |
| <i>ALK</i> (NM_004304)       | <i>KDM6A</i> (NM_021140)     |
| <i>ATRIP</i> (NM_130384)     | <i>KIF5B</i> (NM_004521)     |
| <i>ARID1A</i> (NM_006015)    | <i>KLLN</i> (NM_001126049)   |
| <i>ABCC11</i> (NM_032583)    | <i>KMT2D</i> (NM_003482)     |
| <i>ADCY2</i> (NM_020546)     | <i>KRT5</i> (NM_000424)      |
| <i>ALOX12</i> (NM_000697)    | <i>LARP4</i> (NM_052879)     |
| <i>ARID1B</i> (NM_020732)    | <i>LBR</i> (NM_002296)       |
| <i>ATRX</i> (NM_000489)      | <i>LIG3</i> (NM_013975)      |
| <i>ABCC2</i> (NM_000392)     | <i>LRIG3</i> (NM_153377)     |
| <i>ADH1B</i> (NM_000668)     | <i>LRP2</i> (NM_004525)      |
| <i>AMER1</i> (NM_152424)     | <i>LATS1</i> (NM_004690)     |
| <i>ARID2</i> (NM_152641)     | <i>LGALS8</i> (NM_006499)    |
| <i>AURKA</i> (NM_003600)     | <i>LIG4</i> (NM_002312)      |
| <i>ABCC4</i> (NM_005845)     | <i>LRMDA</i> (NM_032024.3)   |
| <i>ADH1C</i> (NM_000669)     | <i>LYN</i> (NM_002350)       |
| <i>ANXA5</i> (NM_001154)     | <i>LATS2</i> (NM_014572)     |
| <i>AURKB</i> (NM_004217)     | <i>LGR5</i> (NM_003667)      |
| <i>ARMS2</i> (NM_001099667)  | <i>LMO1</i> (NM_002315)      |
| <i>ABCC5</i> (NM_005688)     | <i>LRP1B</i> (NM_018557)     |
| <i>AIP</i> (NM_003977)       | <i>LZTR1</i> (NM_006767)     |
| <i>APC</i> (NM_000038)       | <i>MAD1L1</i> (NM_003550)    |
| <i>ASNS</i> (NM_001673)      | <i>MAPK3</i> (NM_001040056)  |
| <i>AXIN1</i> (NM_003502)     | <i>MEN1</i> (NM_000244)      |
| <i>ABCG1</i> (NM_016818)     | <i>MPL</i> (NM_005373)       |
| <i>AXIN2</i> (NM_004655)     | <i>MUTYH</i> (NM_001128425)  |
| <i>APLF</i> (NM_173545)      | <i>MALAT1</i> (NR_002819)    |
| <i>ASPH</i> (NM_004318)      | <i>MAPKBP1</i> (NM_014994)   |
| <i>AKR1C3</i> (NM_001253908) | <i>MET</i> (NM_001127500)    |
| <i>ABCG2</i> (NM_004827)     | <i>MRE11A</i> (NM_005590)    |
| <i>AKT1</i> (NM_005163)      | <i>MYC</i> (NM_002467)       |
| <i>APOB</i> (NM_000384)      | <i>MAP2K1</i> (NM_002755)    |
| <i>ASXL1</i> (NM_015338)     | <i>MAX</i> (NM_002382)       |
| <i>AXL</i> (NM_001699)       | <i>MGAT4A</i> (NM_012214)    |
| <i>ABL1</i> (NM_005157)      | <i>MSH2</i> (NM_000251)      |
| <i>AKT2</i> (NM_001626)      | <i>MYCL</i> (NM_001033082)   |
| <i>AR</i> (NM_000044)        | <i>MAP2K2</i> (NM_030662)    |
| <i>ATM</i> (NM_000051)       | <i>MCL1</i> (NM_021960)      |
| <i>ACSS2</i> (NM_018677)     | <i>MIR3936HG</i> (NR_110997) |
| <i>AKT3</i> (NM_181690)      | <i>MSH3</i> (NM_002439)      |

*ARAF* (NM\_001654)  
*ATP7B* (NM\_000053)  
*B2M* (NM\_004048)  
*BCL2L1* (NM\_138578)  
*BCORL1* (NM\_021946)  
*BRCA1* (NM\_007294)  
*BRE* (NM\_004899)  
*BAP1* (NM\_004656)  
*BCL2L11* (NM\_138625)  
*BLM* (NM\_000057)  
*BRCA2* (NM\_000059)  
*BRIP1* (NM\_032043)  
*BARD1* (NM\_000465)  
*BCL6* (NM\_001706)  
*BMPR1A* (NM\_004329)  
*BRD2* (NM\_001113182)  
*BTK* (NM\_000061)  
*BCL2* (NM\_000633)  
*BCOR* (NM\_001123383)  
*BRAF* (NM\_004333)  
*BRD4* (NM\_058243)  
*BUB1* (NM\_004336)  
*C8orf34* (NM\_052958)  
*CCL18* (NM\_002988)  
*CDK8* (NM\_001260)  
*CLK2* (NM\_003993)  
*CXCC4* (NM\_025212)  
*CACNA1C* (NM\_000719)  
*CCND1* (NM\_053056)  
*CDKN1A* (NM\_078467)  
*CMPK1* (NM\_016308)  
*CYLD* (NM\_015247)  
*CADM2* (NM\_153184)  
*CCND2* (NM\_001759)  
*CDKN1B* (NM\_004064)  
*CYP19A1* (NM\_000103)  
*CNTNAP5* (NM\_130773)  
*CALR* (NM\_004343)  
*CCND3* (NM\_001760)  
*CDKN1C* (NM\_000076)  
*CREBBP* (NM\_004380)  
*CYP1A1* (NM\_000499)  
*CAMTA1* (NM\_015215)  
*CCNE1* (NM\_001238)  
*CDKN2A* (NM\_000077)  
*CRKL* (NM\_005207)  
*CYP1A2* (NM\_000761)  
*MYCN* (NM\_005378)  
*MAP2K4* (NM\_003010)  
*MDH2* (NM\_005918)  
*MIR4713HG* (NR\_146310)  
*MSH6* (NM\_000179)  
*MYD88* (NM\_001172567)  
*MAP3K1* (NM\_005921)  
*MDM2* (NM\_002392)  
*MITF* (NM\_000248)  
*MST1R* (NM\_001244937)  
*MYOD1* (NM\_002478)  
*MAP3K6* (NM\_004672)  
*MDM4* (NM\_002393)  
*MKI67* (NM\_002417)  
*MTHFR* (NM\_005957)  
*MAP4K4* (NM\_004834)  
*MED12* (NM\_005120)  
*MLH1* (NM\_000249)  
*MTOR* (NM\_004958)  
*MAPK1* (NM\_002745)  
*MEF2B* (NM\_005919)  
*MLH3* (NM\_001040108)  
*MTUS1* (NM\_020749)  
*NAB2* (NM\_005967)  
*NF2* (NM\_000268)  
*NOTCH3* (NM\_000435)  
*NRAS* (NM\_002524)  
*NTRK3* (NM\_001007156)  
*NAT2* (NM\_000015)  
*NFE2L2* (NM\_006164)  
*NOVA1* (NM\_006491)  
*NRG1* (NM\_001159995)  
*NUP93* (NM\_014669)  
*NBN* (NM\_002485)  
*NFKBIA* (NM\_020529)  
*NPM1* (NM\_002520)  
*NSD1* (NM\_022455)  
*NUTM1* (NM\_175741)  
*NCOA1* (NM\_003743)  
*NKX2-1* (NM\_003317)  
*NQO1* (NM\_000903)  
*NT5C2* (NM\_012229)  
*OPRM1* (NM\_001008503)  
*NCOA3* (NM\_006534)  
*NOS3* (NM\_000603)  
*NQO2* (NM\_000904)  
*NTHL1* (NM\_002528)

*CAPN2*(NM\_001748)  
*CD274*(NM\_014143)  
*CDKN2B*(NM\_004936)  
*CRLF2*(NM\_022148)  
*CYP1B1*(NM\_000104)  
*CARD11*(NM\_032415)  
*CD74*(NM\_001025159)  
*CDKN2C*(NM\_001262)  
*CSDE1*(NM\_001007553)  
*CYP2B6*(NM\_000767)  
*CASC8*(NR\_024393)  
*CD79A*(NM\_001783)  
*CEBPA*(NM\_004364)  
*CSF1R*(NM\_005211)  
*CYP2C19*(NM\_000769)  
*CASP7*(NM\_001227)  
*CD79B*(NM\_001039933)  
*CES1*(NM\_001025195)  
*CSF3R*(NM\_156039)  
*CYP2C8*(NM\_000770)  
*CASP8*(NM\_001228)  
*CDA*(NM\_001785)  
*CFD*(NM\_001928)  
*CSMD3*(NM\_052900)  
*CYP2C9*(NM\_000771)  
*CBFB*(NM\_001755)  
*CDC25C*(NM\_001790)  
*CFH*(NM\_000186)  
*CSNK1A1*(NM\_001892)  
*CYP2D6*(NM\_000106)  
*CBL*(NM\_005188)  
*CDC73*(NM\_024529)  
*CFTR*(NM\_000492)  
*CSNK2A1*(NM\_001895)  
*CYP2E1*(NM\_000773)  
*CBLB*(NM\_170662)  
*CDH1*(NM\_004360)  
*CHD4*(NM\_001273)  
*CTCF*(NM\_006565)  
*CYP3A4*(NM\_017460)  
*CBR1*(NM\_001757)  
*CDK12*(NM\_016507)  
*CHEK1*(NM\_001274)  
*CTNNA1*(NM\_001903)  
*CYP3A5*(NM\_000777)  
*CBR3*(NM\_001236)  
*CDK2*(NM\_001798)

*OTOS*(NM\_148961)  
*NCOA4*(NM\_001145260)  
*NOTCH1*(NM\_017617)  
*NR1I2*(NM\_003889)  
*NTRK1*(NM\_002529)  
*NF1*(NM\_000267)  
*NOTCH2*(NM\_024408)  
*NR4A3*(NM\_006981)  
*NTRK2*(NM\_006180)  
*PAK1*(NM\_002576)  
*PCLO*(NM\_014510)  
*PIK3CG*(NM\_002649)  
*POR*(NM\_000941)  
*PRSS1*(NM\_002769)  
*PALB2*(NM\_024675)  
*PDCD1*(NM\_005018)  
*PIK3R1*(NM\_181523)  
*PPIB*(NM\_000942)  
*PSME2*(NM\_002818)  
*PALLD*(NM\_016081)  
*PDCD1LG2*(NM\_025239)  
*PIK3R2*(NM\_005027)  
*PPP2R1A*(NM\_014225)  
*PTCH1*(NM\_000264)  
*PARD3B*(NM\_057177)  
*PDGFB*(NM\_002608)  
*PIM1*(NM\_001243186)  
*PPP2R2A*(NM\_002717)  
*PTCH2*(NM\_003738)  
*PARK2*(NM\_004562)  
*PDGFRA*(NM\_006206)  
*PLAUR*(NM\_002659)  
*PPP4R4*(NM\_058237)  
*PTEN*(NM\_000314)  
*PARK7*(NM\_007262)  
*PDGFRB*(NM\_002609)  
*PLCG2*(NM\_002661)  
*PRDM1*(NM\_001198)  
*PTGER4*(NM\_000958)  
*PARP1*(NM\_001618)  
*PDPK1*(NM\_002613)  
*PLIN2*(NM\_001122)  
*PRDX4*(NM\_006406)  
*PTGES*(NM\_004878)  
*PAX3*(NM\_000438)  
*PGR*(NM\_000926)  
*PMS1*(NM\_000534)

*CHEK2* (NM\_007194)  
*CTNNB1* (NM\_001904)  
*CCAT2* (NR\_109834)  
*CDK4* (NM\_000075)  
*FNTB* (NM\_002028.3)  
*CUL3* (NM\_003590)  
*CCDC6* (NM\_005436)  
*CDK6* (NM\_001259)  
*CIC* (NM\_015125)  
*CXCR4* (NM\_003467)  
*DAXX* (NM\_001141969)  
*DDR2* (NM\_006182)  
*DHFR* (NM\_000791)  
*DNMT3A* (NM\_022552)  
*DSCAM* (NM\_001389)  
*DDB2* (NM\_000107)  
*DDX3X* (NM\_001356)  
*DICER1* (NM\_177438)  
*DOT1L* (NM\_032482)  
*DYNC2H1* (NM\_001080463)  
*DDIT3* (NM\_004083)  
*DDX51* (NM\_175066)  
*DNMT1* (NM\_001130823)  
*DPYD* (NM\_000110)  
*E2F7* (NM\_203394)  
*EML4* (NM\_019063)  
*EPHB1* (NM\_004441)  
*ERCC5* (NM\_000123)  
*ETV6* (NM\_001987)  
*ECT2L* (NM\_001077706)  
*ENOSF1* (NM\_017512)  
*EPHX1* (NM\_001136018)  
*ERCC6* (NM\_000124)  
*EWSR1* (NM\_005243)  
*EDN1* (NM\_001955)  
*EP300* (NM\_001429)  
*ERBB2* (NM\_004448)  
*EREG* (NM\_001432)  
*EXT1* (NM\_000127)  
*EED* (NM\_003797)  
*EPAS1* (NM\_001430)  
*ERBB3* (NM\_001982)  
*ERG* (NM\_182918)  
*EXT2* (NM\_000401)  
*EEF1A1* (NM\_001402)  
*EPCAM* (NM\_002354)  
*ERBB4* (NM\_001042599)  
*PREX2* (NM\_025170)  
*PTGS2* (NM\_000963)  
*PAX5* (NM\_016734)  
*PIAS4* (NM\_015897)  
*PMS2* (NM\_000535)  
*PRKACA* (NM\_002730)  
*PTN* (NM\_002825)  
*PAX7* (NM\_002584)  
*PIGB* (NM\_004855)  
*POLD1* (NM\_002691)  
*PRKACB* (NM\_182948)  
*PTPN11* (NM\_002834)  
*PAX8* (NM\_003466)  
*PIK3CA* (NM\_006218)  
*POLE* (NM\_006231)  
*PRKAR1A* (NM\_002734)  
*PTPRD* (NM\_001040712)  
*PBRM1* (NM\_018165)  
*PIK3CB* (NM\_006219)  
*POLH* (NM\_006502)  
*PRKCI* (NM\_002740)  
*PTPRT* (NM\_007050)  
*PCBP1* (NM\_006196)  
*PIK3CD* (NM\_005026)  
*POLQ* (NM\_199420)  
*PRKDC* (NM\_006904)  
*PZP* (NM\_002864)  
*RAC1* (NM\_018890)  
*RAF1* (NM\_002880)  
*RET* (NM\_020630)  
*RIF1* (NM\_001177663)  
*RPS20* (NM\_001023)  
*RAD21* (NM\_006265)  
*RARA* (NM\_000964)  
*REV3L* (NM\_002912)  
*RILP* (NM\_031430)  
*RPS6KB1* (NM\_003161)  
*RAD50* (NM\_005732)  
*RB1* (NM\_000321)  
*RFC1* (NM\_002913)  
*RINT1* (NM\_021930)  
*RPTOR* (NM\_020761)  
*RAD51* (NM\_002875)  
*RBFOX1* (NM\_145891)  
*RFC4* (NM\_002916)  
*RIT1* (NM\_006912)  
*RRAS2* (NM\_001177314)

*ERRFI1* (NM\_018948)  
*EZH2* (NM\_004456)  
*EGF* (NM\_001963)  
*EPHA2* (NM\_004431)  
*ERCC1* (NM\_001983)  
*ESR1* (NM\_000125)  
*EGFR* (NM\_005228)  
*EPHA3* (NM\_005233)  
*ERCC2* (NM\_000400)  
*ESR2* (NM\_001040275)  
*EIF3A* (NM\_003750)  
*EPHA5* (NM\_004439)  
*ERCC3* (NM\_000122)  
*ETV1* (NM\_004956)  
*ELAC2* (NM\_001165962)  
*EPHA7* (NM\_004440)  
*ERCC4* (NM\_005236)  
*ETV4* (NM\_001986)  
*FAM175A* (NM\_139076)  
*FAT1* (NM\_005245)  
*FGF23* (NM\_020638)  
*FGFR2* (NM\_000141)  
*FOXA1* (NM\_004496)  
*FAM46C* (NM\_017709)  
*FBN3* (NM\_032447)  
*FGF3* (NM\_005247)  
*FGFR3* (NM\_000142)  
*FOXK2* (NM\_004514)  
*FANCA* (NM\_000135)  
*FBXW7* (NM\_018315)  
*FGF4* (NM\_002007)  
*FGFR4* (NM\_022963)  
*FOXL2* (NM\_023067)  
*FANCB* (NM\_001018113)  
*FCGR2A* (NM\_021642)  
*FGF5* (NM\_004464)  
*FH* (NM\_000143)  
*FOXM1* (NM\_021953)  
*FANCC* (NM\_000136)  
*FCGR3A* (NM\_001127593)  
*FGF6* (NM\_020996)  
*FLCN* (NM\_144997)  
*FOXP1* (NM\_032682)  
*FANCG* (NM\_004629)  
*FGF1* (NM\_000800)  
*FGF7* (NM\_002009)  
*FLT1* (NM\_002019)

*RAD51B* (NM\_002877)  
*RBM10* (NM\_005676)  
*RGS5* (NM\_003617)  
*RNASEL* (NM\_021133)  
*RRM1* (NM\_001033)  
*RAD51C* (NM\_058216)  
*RECK* (NM\_021111)  
*RHBDF2* (NM\_024599)  
*RNF43* (NM\_017763)  
*RSF1* (NM\_016578)  
*RAD51D* (NM\_002878)  
*RECQL* (NM\_002907)  
*RHEB* (NM\_005614)  
*ROBO2* (NM\_002942)  
*RUNX1* (NM\_001754)  
*RAD52* (NM\_134424)  
*RECQL4* (NM\_004260)  
*RHOA* (NM\_001664)  
*ROS1* (NM\_002944)  
*RAD54L* (NM\_003579)  
*REL* (NM\_002908)  
*RICTOR* (NM\_152756)  
*RPA4* (NM\_013347)  
*SBDS* (NM\_016038)  
*SETD2* (NM\_014159)  
*SLC22A5* (NM\_003060)  
*SMARCB1* (NM\_003073)  
*SRD5A2* (NM\_000348)  
*SCN10A* (NM\_006514)  
*SETD7* (NM\_030648)  
*SLC28A1* (NM\_004213)  
*SMO* (NM\_005631)  
*SRSF2* (NM\_003016)  
*SDHA* (NM\_004168)  
*SF3B1* (NM\_012433)  
*SLC28A2* (NM\_004212)  
*SOCS1* (NM\_003745)  
*SS18* (NM\_001007559)  
*SDHAF2* (NM\_017841)  
*SH2B3* (NM\_005475)  
*SLC29A1* (NM\_004955.2)  
*SOCS6* (NM\_004232)  
*STAG2* (NM\_001042749)  
*SDHB* (NM\_003000)  
*SHMT1* (NM\_004169)  
*SLC31A1* (NM\_001859)  
*SOD2* (NM\_001024465)



*FOXP2*(NM\_014491)  
*FANCI*(NM\_001113378)  
*FGF10*(NM\_004465)  
*FGF8*(NM\_006119)  
*FLT3*(NM\_004119)  
*FRS2*(NM\_006654)  
*FANCL*(NM\_018062)  
*FGF19*(NM\_005117)  
*FGF9*(NM\_002010)  
*FLT4*(NM\_182925)  
*FUBP1*(NM\_003902)  
*FANCM*(NM\_020937)  
*FGF2*(NM\_002006)  
*FGFR1*(NM\_023110)  
*FOLR3*(NM\_000804)  
*FUS*(NM\_004960)  
*GAB2*(NM\_080491)  
*GATA6*(NM\_005257)  
*GLIPR1*(NM\_006851)  
*GPER1*(NM\_001039966)  
*GSK3B*(NM\_001146156)  
*GALNT12*(NM\_024642)  
*GEMIN6*(NM\_024775)  
*GLRX*(NM\_002064)  
*GPRIN2*(NM\_014696)  
*GSR*(NM\_000637)  
*GALNT14*(NM\_001253826)  
*GEN1*(NM\_182625)  
*GMEB1*(NM\_006582)  
*GPX5*(NM\_001509)  
*GSTA1*(NM\_145740)  
*GATA1*(NM\_002049)  
*GGH*(NM\_003878)  
*GNA11*(NM\_002067)  
*GREM1*(NM\_013372)  
*GSTM3*(NM\_000849)  
*GATA2*(NM\_032638)  
*GK5*(NM\_001039547)  
*GNAQ*(NM\_002072)  
*GRIN2A*(NM\_000833)  
*GSTP1*(NM\_000852)  
*GATA3*(NM\_001002295)  
*GLI1*(NM\_005269)  
*GNAS*(NM\_000516)  
*GRM1*(NM\_001278064)  
*H19*(NR\_002196)  
*HGF*(NM\_000601)

*STAT3*(NM\_139276)  
*SDHC*(NM\_003001)  
*SHOX*(NM\_000451)  
*SLC34A2*(NM\_006424)  
*SOX10*(NM\_006941)  
*STK11*(NM\_000455)  
*SDHD*(NM\_003002)  
*SHPRH*(NM\_173082)  
*SLCO1B1*(NM\_006446)  
*SOX2*(NM\_003106)  
*SUFU*(NM\_016169)  
*SELE*(NM\_000450)  
*SLC15A2*(NM\_021082)  
*SLCO1B3*(NM\_019844)  
*SOX4*(NM\_003107)  
*SULT1A1*(NM\_001055)  
*SELL*(NM\_000655)  
*SLC19A1*(NM\_030582)  
*SLX4*(NM\_032444)  
*SOX9*(NM\_000346)  
*SUZ12*(NM\_015355)  
*SEMA3C*(NM\_006379)  
*SLC22A1*(NM\_003057)  
*SMAD2*(NM\_005901)  
*SPEN*(NM\_015001)  
*SWI5*(NM\_001040011)  
*SERPINB3*(NM\_006919)  
*SLC22A16*(NM\_033125)  
*SMAD3*(NM\_005902)  
*SPINK1*(NM\_003122)  
*SYK*(NM\_001135052)  
*SERPINB4*(NM\_002974)  
*SLC22A2*(NM\_003058)  
*SMAD4*(NM\_005359)  
*SPOP*(NM\_003563)  
*SYNE1*(NM\_033071)  
*SETBP1*(NM\_015559)  
*SLC22A4*(NM\_003059)  
*SMARCA4*(NM\_001128849)  
*SRC*(NM\_198291)  
*TACSTD2*(NM\_002353)  
*TFE3*(NM\_006521)  
*TNFRSF11B*(NM\_002546)  
*TP53*(NM\_000546)  
*TSC2*(NM\_000548)  
*TBX3*(NM\_005996)  
*TGFB1*(NM\_000660)

*HLA-DPB1* (NM\_002121)  
*HNF1A* (NM\_000545)  
*HSD17B3* (NM\_000197)  
*H3F3A* (NM\_002107)  
*HIF1A* (NM\_001530)  
*HLA-DQB1* (NM\_002123)  
*HNF1B* (NM\_000458)  
*HSD3B2* (NM\_000198)  
*HDAC2* (NM\_001527)  
*HKDC1* (NM\_025130)  
*HLA-DRB1* (NM\_002124)  
*HOTAIR* (NR\_047517)  
*HSP90AA1* (NM\_005348)  
*HERC2* (NM\_004667)  
*HLA-A* (NM\_002116)  
*HLA-G* (NM\_002127)  
*HOXB13* (NM\_006361)  
*HSPA5* (NM\_005347)  
*HFE2* (NM\_145277)  
*HLA-B* (NM\_005514)  
*HMGGA2* (NM\_003483)  
*HPSE2* (NM\_021828)  
*HTRA1* (NM\_002775)  
*HFM1* (NM\_001017975)  
*HLA-C* (NM\_002117)  
*HMGCR* (NM\_000859)  
*HRAS* (NM\_005343)  
*IDH1* (NM\_005896)  
*IFNLR1* (NM\_170743)  
*IKZF1* (NM\_006060)  
*IL7R* (NM\_002185)  
*IRS2* (NM\_003749)  
*IDH2* (NM\_002168)  
*IGF1R* (NM\_000875)  
*IL13* (NM\_002188)  
*INHBA* (NM\_002192)  
*JAK1* (NM\_002227)  
*IFNGR1* (NM\_000416)  
*IGF2* (NM\_000612)  
*IL16* (NM\_001172128)  
*INPP4B* (NM\_003866)  
*JAK2* (NM\_004972)  
*IFNGR2* (NM\_005534)  
*IGFBP3* (NM\_001013398)  
*IL1B* (NM\_000576)  
*IRF1* (NM\_002198)  
*JAK3* (NM\_000215)  
*TNFRSF14* (NM\_003820)  
*TP53BP1* (NM\_001141979)  
*TSHR* (NM\_000369)  
*TCEB1* (NM\_005648)  
*TGFBR2* (NM\_001024847)  
*TNFRSF19* (NM\_018647)  
*TPMT* (NM\_000367)  
*TSPAN31* (NM\_005981)  
*TERC* (NR\_001566)  
*TMEM127* (NM\_017849)  
*TNFSF11* (NM\_033012)  
*TRAF1* (NM\_005658)  
*TTK* (NM\_001166691)  
*TERT* (NM\_198253)  
*TMPRSS2* (NM\_001135099)  
*TNFSF8* (NM\_001244)  
*TRAM2-AS1* (NR\_103446)  
*TUBB1* (NM\_030773)  
*TET1* (NM\_030625)  
*TNF* (NM\_000594)  
*TOP1* (NM\_003286)  
*TREX2* (NM\_080701)  
*TYMS* (NM\_001071)  
*TET2* (NM\_017628)  
*TNFAIP3* (NM\_006290)  
*TOP2A* (NM\_001067)  
*TSC1* (NM\_000368)  
*U2AF1* (NM\_006758)  
*UBE2A* (NM\_003336)  
*UBE2I* (NM\_003345)  
*UBE2V2* (NM\_003350)  
*UGT1A1* (NM\_000463)  
*UGT1A4* (NM\_007120)  
*UGT1A6* (NM\_001072)  
*UGT1A9* (NM\_021027)  
*VEGFA* (NM\_001025366)  
*VEGFC* (NM\_005429)  
*VHL* (NM\_000551)  
*WAS* (NM\_000377)  
*WIF1* (NM\_007191)  
*WNK2* (NM\_006648)  
*WNT5B* (NM\_032642)  
*WRN* (NM\_000553)  
*WT1* (NM\_024426)  
*XPB1* (NM\_005080)  
*XPA* (NM\_000380)  
*XPC* (NM\_004628)

*IFNL2*(NM\_172138) *XPO1*(NM\_003400)  
*IKBKE*(NM\_001193321) *XRCC1*(NM\_006297)  
*IL23R*(NM\_144701) *XRCC2*(NM\_005431)  
*IRF4*(NM\_001195286) *XRCC4*(NM\_022406)  
*JUN*(NM\_002228) *YAP1*(NM\_006106)  
*KCNJ5*(NM\_000890) *YES1*(NM\_005433)  
*KDR*(NM\_002253) *ZBTB16*(NM\_006006)  
*KIT*(NM\_000222) *ZNF367*(NM\_153695)  
*KMT2A*(NM\_001197104) *ZNF423*(NM\_001271620)  
*KRAS*(NM\_004985) *ZNF750*(NM\_024702)  
*KDM5A*(NM\_001042603) *KEAP1*(NM\_012289) *ZRSR2*(NM\_005089)  
*KLC1*(NM\_001130107)

**Note:** The detection range covers the entire coding region of 528 genes and the adjacent introns  $\pm$  20bp, and part of the region of 152 genes. Gene names followed the rules of the HUGO Gene Nomenclature Committee (HGNC); gene transcripts were selected using the Locus Reference Genomic.

**Supplementary Table 2.** Baseline characteristics of 109 CRC patients (ICI-treated CRC cohort).

|                            | <b>NOTCH Signaling<br/>MT<br/>(N=52)</b> | <b>NOTCH Signaling<br/>WT<br/>(N=57)</b> | <b>Overall<br/>(N=109)</b> | <b>p value</b> |
|----------------------------|------------------------------------------|------------------------------------------|----------------------------|----------------|
| <b>factor(Gender)</b>      |                                          |                                          |                            |                |
| Female                     | 23 (44.2%)                               | 25 (43.9%)                               | 48 (44.0%)                 | 1              |
| Male                       | 29 (55.8%)                               | 32 (56.1%)                               | 61 (56.0%)                 |                |
| <b>factor(SAMPLE_TYPE)</b> |                                          |                                          |                            |                |
| Metastasis                 | 30 (57.7%)                               | 29 (50.9%)                               | 59 (54.1%)                 | 0.5667         |
| Primary                    | 22 (42.3%)                               | 28 (49.1%)                               | 50 (45.9%)                 |                |
| <b>factor(Drug_Type)</b>   |                                          |                                          |                            |                |
| Combination                | 3 (5.8%)                                 | 7 (12.3%)                                | 10 (9.2%)                  | 0.2565         |
| CTLA4                      | 1 (1.9%)                                 | 0 (0%)                                   | 1 (0.9%)                   |                |
| PD-1/PDL-1                 | 48 (92.3%)                               | 50 (87.7%)                               | 98 (89.9%)                 |                |
| <b>TMB</b>                 |                                          |                                          |                            |                |
| Mean (SD)                  | 48.4 (44.9)                              | 7.37 (5.89)                              | 26.9 (37.3)                | 1.4e-07*       |
| Median [Min, Max]          | 45.4 [1.97, 204]                         | 6.14 [1.97, 44.8]                        | 7.90 [1.97, 204]           |                |
| <b>Age</b>                 |                                          |                                          |                            |                |
| Mean (SD)                  | 55.8 (13.4)                              | 52.9 (13.7)                              | 54.3 (13.5)                | 0.22           |
| Median [Min, Max]          | 58.5 [25.0, 82.0]                        | 53.0 [19.0, 81.0]                        | 56.0 [19.0, 82.0]          |                |

**Supplementary Table 3.** Baseline characteristics of CRC patients (TCGA-CRC cohort).

|                          | <b>NOTCH Signaling<br/>MT<br/>(N=175)</b> | <b>NOTCH Signaling<br/>WT<br/>(N=351)</b> | <b>Overall<br/>(N=526)</b> | <b>P value</b> |
|--------------------------|-------------------------------------------|-------------------------------------------|----------------------------|----------------|
| <b>factor(Gender)</b>    |                                           |                                           |                            |                |
| female                   | 92 (52.6%)                                | 158 (45.0%)                               | 250 (47.5%)                | 0.1153         |
| male                     | 83 (47.4%)                                | 193 (55.0%)                               | 276 (52.5%)                |                |
| <b>factor(TNM_Stage)</b> |                                           |                                           |                            |                |
| I                        | 29 (16.6%)                                | 59 (16.8%)                                | 88 (16.7%)                 | 0.006791*      |
| II                       | 81 (46.3%)                                | 109 (31.1%)                               | 190 (36.1%)                |                |
| III                      | 45 (25.7%)                                | 107 (30.5%)                               | 152 (28.9%)                |                |
| IV                       | 17 (9.7%)                                 | 59 (16.8%)                                | 76 (14.4%)                 |                |
| Missing                  | 3 (1.7%)                                  | 17 (4.8%)                                 | 20 (3.8%)                  |                |
| <b>factor(Ethnicity)</b> |                                           |                                           |                            |                |
| hispanic or latino       | 2 (1.1%)                                  | 3 (0.9%)                                  | 5 (1.0%)                   | 1              |
| not hispanic or latino   | 113 (64.6%)                               | 219 (62.4%)                               | 332 (63.1%)                |                |
| Missing                  | 60 (34.3%)                                | 129 (36.8%)                               | 189 (35.9%)                |                |
| <b>factor(Disease)</b>   |                                           |                                           |                            |                |
| COAD                     | 137 (78.3%)                               | 256 (72.9%)                               | 393 (74.7%)                | 0.2021         |
| READ                     | 38 (21.7%)                                | 95 (27.1%)                                | 133 (25.3%)                |                |
| <b>Age</b>               |                                           |                                           |                            |                |
| Mean (SD)                | 66.3 (13.5)                               | 66.0 (12.5)                               | 66.1 (12.8)                | 0.7            |
| Median [Min, Max]        | 68.0 [33.0, 90.0]                         | 68.0 [31.0, 90.0]                         | 68.0 [31.0, 90.0]          |                |

**Supplementary Table 4.** Baseline characteristics of 103 CRC patients (Local-CRC cohort).

|                           | <b>NOTCH Signaling<br/>MT<br/>(N=27)</b> | <b>NOTCH Signaling<br/>WT<br/>(N=75)</b> | <b>Overall<br/>(N=103)</b> | <b>p value</b> |
|---------------------------|------------------------------------------|------------------------------------------|----------------------------|----------------|
| <b>factor(MSI_Status)</b> |                                          |                                          |                            |                |
| MSI-H                     | 1 (3.7%)                                 | 5 (6.7%)                                 | 6 (5.8%)                   |                |
| MSI-L                     | 1 (3.7%)                                 | 4 (5.3%)                                 | 5 (4.9%)                   | 0.8739         |
| MSS                       | 25 (92.6%)                               | 60 (80.0%)                               | 86 (83.5%)                 |                |
| Missing                   | 0 (0%)                                   | 6 (8.0%)                                 | 6 (5.8%)                   |                |
| <b>TMB</b>                |                                          |                                          |                            |                |
| Mean (SD)                 | 9.63 (19.8)                              | 6.55 (14.3)                              | 7.37 (15.9)                |                |
| Median [Min, Max]         | 4.61 [0, 99.3]                           | 3.29 [0, 87.5]                           | 3.95 [0, 99.3]             | 0.01451*       |
| Missing                   | 0 (0%)                                   | 0 (0%)                                   | 1 (1.0%)                   |                |

**Supplementary Table 5.** The genes in NOTCH pathway.

KEGG\_NOTCH\_SIGNALING\_PATHWAY

|        |        |
|--------|--------|
| ADAM17 | JAG1   |
| APH1A  | JAG2   |
| CIR1   | KAT2A  |
| CREBBP | KAT2B  |
| CTBP1  | LFNG   |
| CTBP2  | MAML1  |
| DLL1   | MAML2  |
| DLL3   | MAML3  |
| DLL4   | MFNG   |
| DTX1   | NCOR2  |
| DTX2   | NCSTN  |
| DTX3   | NOTCH1 |
| DTX3L  | NOTCH2 |
| DTX4   | NOTCH3 |
| DVL1   | NOTCH4 |
| DVL2   | NUMB   |
| DVL3   | NUMBL  |
| EP300  | PSEN1  |
| HDAC1  | PSEN2  |
| HDAC2  | PSENE1 |
| HES1   | PTCRA  |
| HES5   | RBPJ   |
|        | RBPJL  |
|        | RFNG   |
|        | SNW1   |
